# Supplementary material for: Characterization of Metabolites in Plasma, Urine and Feces of Healthy Participants after Taking Brahmi Essence for Twelve Weeks Using LC-ESI-QTOF-MS Metabolomic Approach
Source: MDPI journal article supplement (doi:10.3390/molecules26102944), 2021-05-15
Supplement: s1 [file s1]

## Supplementary data

# Characterization of Metabolites in Plasma, Urine and Feces of Healthy Participants After Taking Brahmi Essence for Twelve Weeks Using LC-ESI-QTOF-MS metabolomic approach

Genet Minale <sup>1</sup>, Tongchai Saesong <sup>1</sup>, Prapapan Temkitthawon <sup>1</sup>, Neti Waranuch <sup>2</sup>, Nitra Nuengchamnong <sup>3</sup>, Krongkarn Chootip <sup>4</sup>, Natakorn Kamkaew <sup>4,5</sup>, Teeraporn Kongbangkerd <sup>6</sup>, Jinutda Engsuwan <sup>7</sup> and Kornkanok Ingkaninan <sup>1,\*</sup>

<sup>1</sup> Centre of Excellence in Cannabis Research, Department of Pharmaceutical Chemistry and Pharmacognosy, Faculty of Pharmaceutical Sciences and Center of Excellence for Innovation in Chemistry, Naresuan University, Phitsanulok 65000, Thailand; genetminaleye59@nu.ac.th (G.M.); tongchais56@nu.ac.th (T.S.); prapapant@nu.ac.th (P.T.)

<sup>2</sup> Cosmetics and Natural Products Research Center, Department of Pharmaceutical Technology, Faculty of Pharmaceutical Sciences, and Center of Excellence for Innovation in Chemistry, Naresuan University, Phitsanulok 65000, Thailand; netiw@nu.ac.th

<sup>3</sup> Science Laboratory Centre, Faculty of Science, Naresuan University, Phitsanulok 65000, Thailand; nitr@nu.ac.th

<sup>4</sup> Department of Physiology, Faculty of Medical Sciences, Naresuan University, Phitsanulok 65000, Thailand; krongkarn@nu.ac.th (K.C.); natakorn.ka@up.ac.th (N.K.)

<sup>5</sup> Unit of Excellence in Clinical Research, Division of Physiology, School of Medical Sciences, University of Phayao, Phayao 56000, Thailand

<sup>6</sup> Department of Agro-Industry, Faculty of Agriculture Natural Resources and Environment, Naresuan University, Phitsanulok 65000, Thailand; teerapornk@nu.ac.th

<sup>7</sup> Department of Cosmetic Sciences, School of Pharmaceutical Sciences, University of Phayao 56000, Thailand; jinutda.en@up.ac.th

\* Correspondence: k\_ingkaninan@yahoo.com or kornkanoki@nu.ac.th; Tel.: +66-81-481-7350

## Table of content

**Figure S1.** Base peak chromatograms (BPC) from positive mode LC-ESI-QTOF-MS of (a) Brahmi essence and (b) placebo where; BaA<sub>3</sub>: bacoside A<sub>3</sub>, Ba II: bacopaside II, BaX: bacopaside X, BaC: bacopasaponin C and Ba I: bacopaside I

**Figure S2.** Scheme of sampling time points of biological samples throughout the study.

**Figure S3:** The PCA score plots of A) plasma, B) urine and C) feces samples

**Figure S4:** The Base peak chromatogram of methanol (blank sample)

**Table S1.** Some tentatively identified compounds in Brahmi essence and placebo analyzed by positive mode LC-ESI-QTOF-MS.

**Table S2.** The percent change of response time for **memory speed** of participants from placebo run-in (2<sup>nd</sup> visit) to after 12-weeks (3<sup>rd</sup> visit) in treatment group and the placebo group.

**Table S3.** p-value of metabolic pathway from enrichment analysis by using Metaboanalyst (a) plasma, (b) Urine, (c) feces Samples.

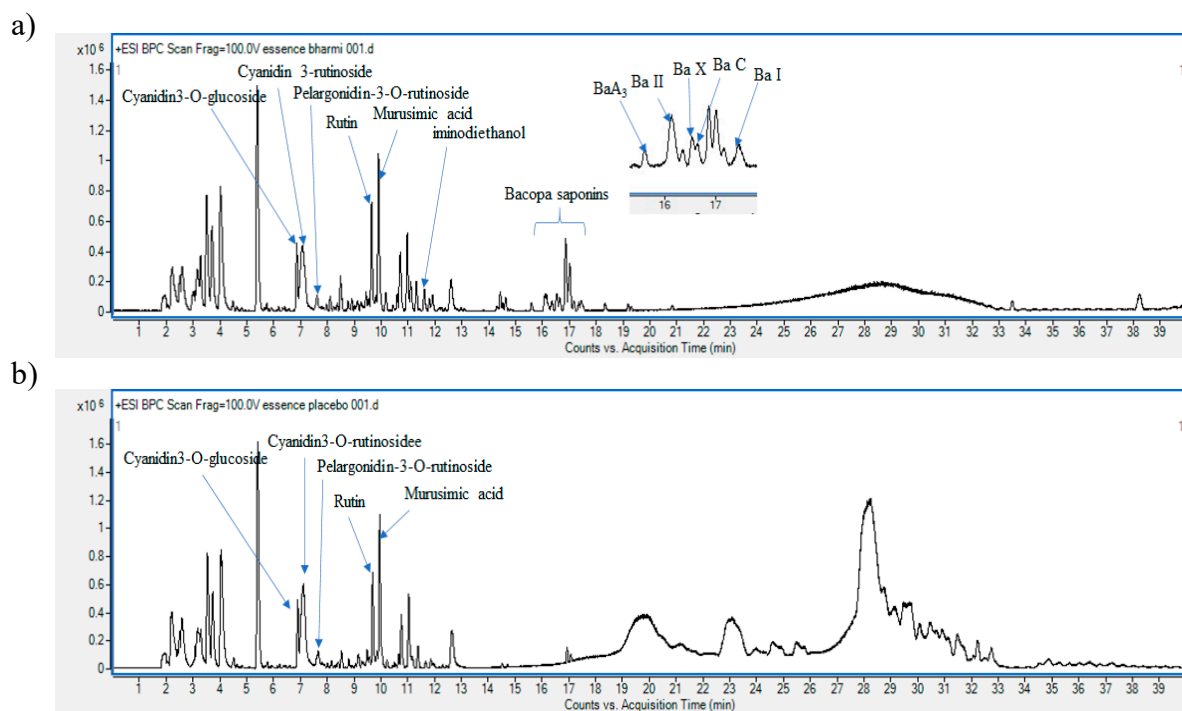

**Figure S1** Base peak chromatograms (BPC) from positive mode LC-ESI-QTOF-MS of (a) Brahmi essence and (b) placebo where; BaA<sub>3</sub>: bacoside A<sub>3</sub>, Ba II: bacopaside II, BaX: bacopaside X, BaC: bacopasaponin C and Ba I: bacopaside I.

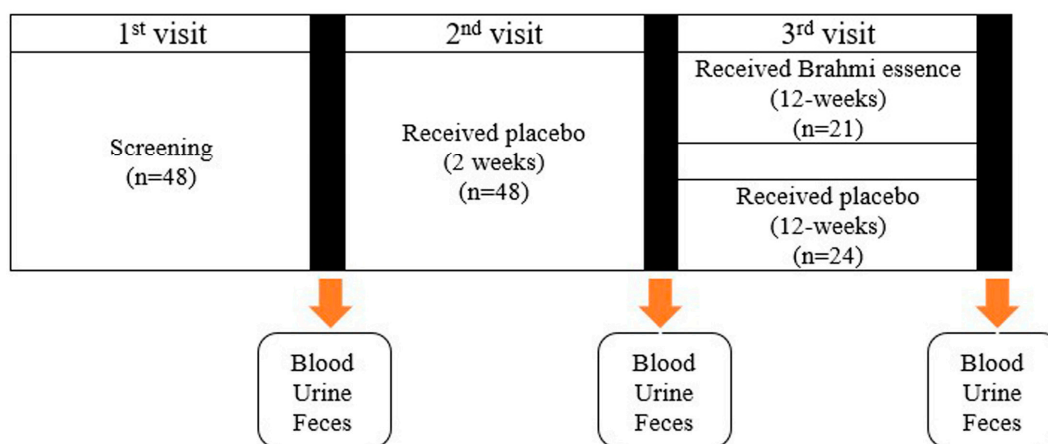

**Figure S2:** Scheme of sampling time points of biological samples throughout the study.

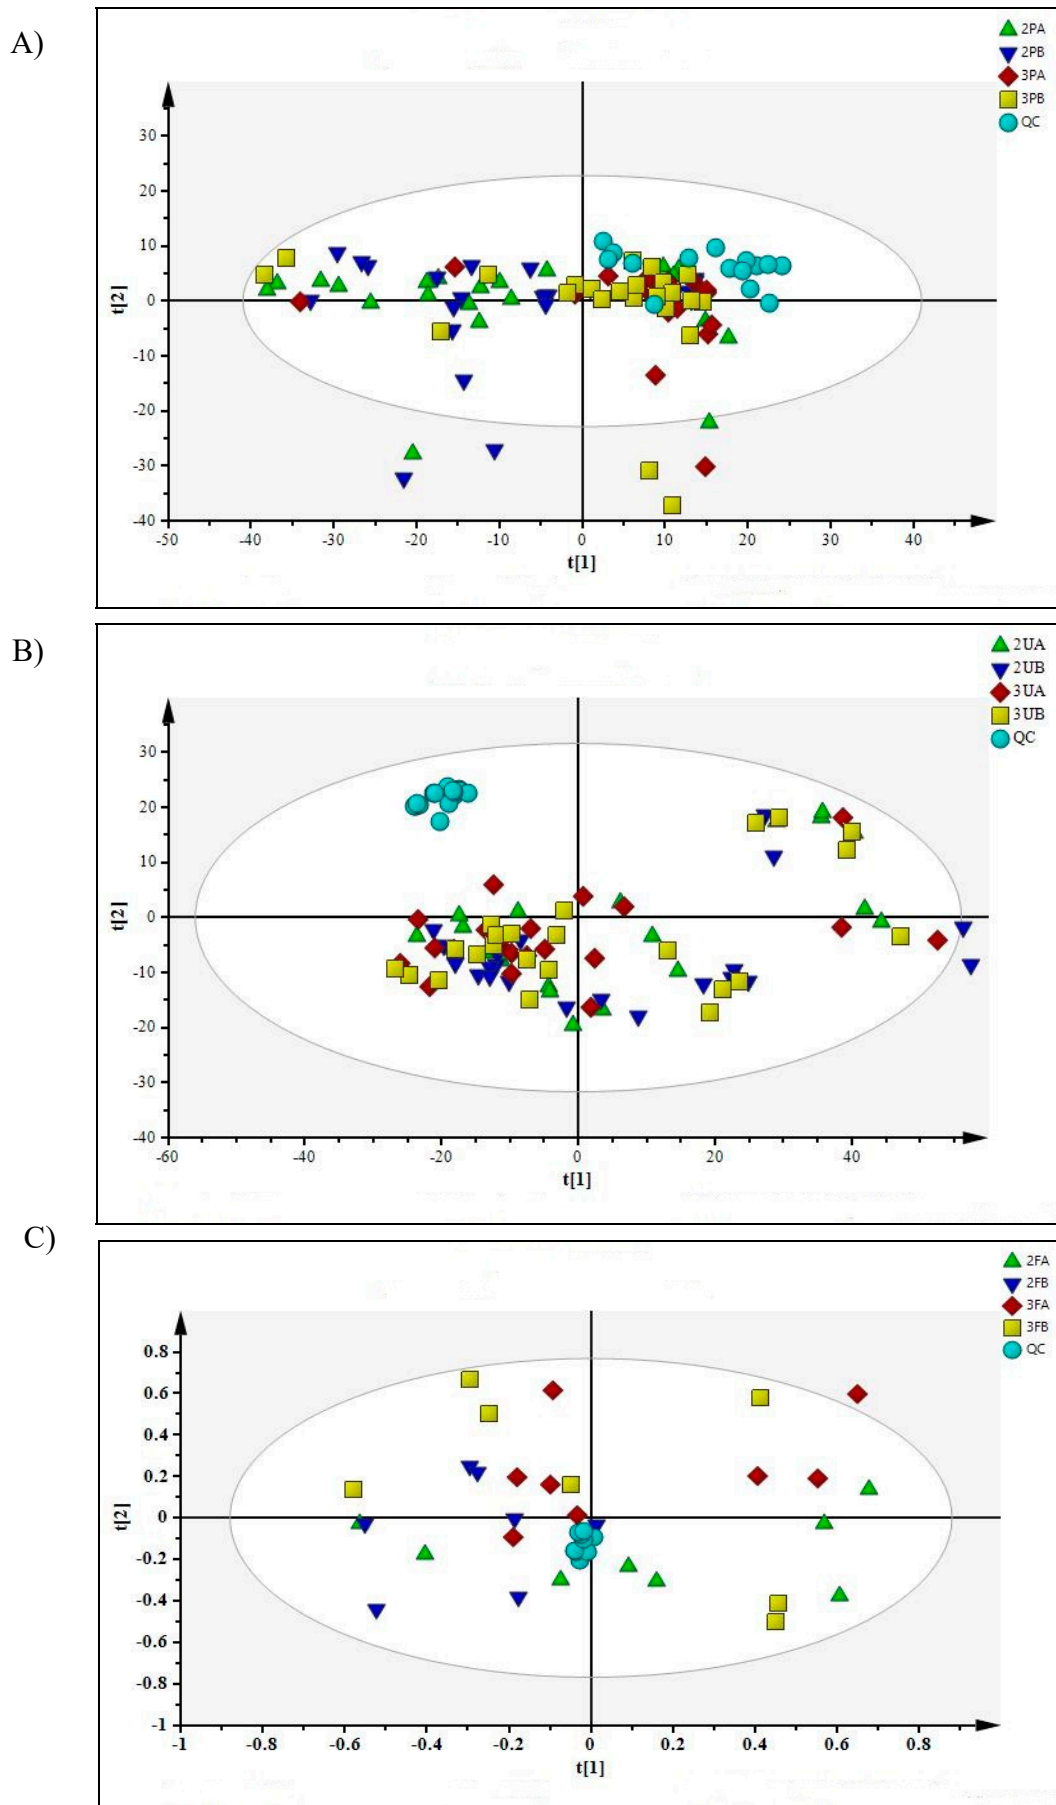

**Figure S3:** The PCA score plots of A) plasma, B) urine and C) feces samples. The data used for PCA were normalized by total peak intensities of each samples.

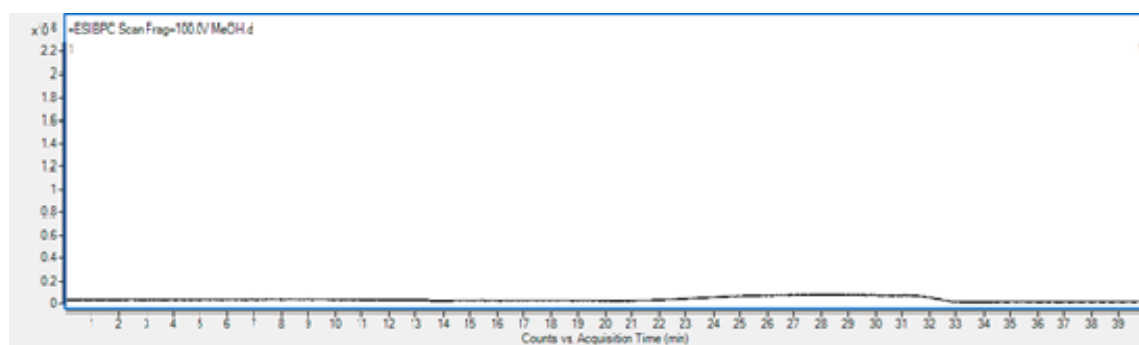

**Figure S4:** The Base peak chromatogram of methanol (blank sample)

**Table S1.** Some tentatively identified compounds in Brahmi essence and placebo analyzed by positive mode LC-ESI-QTOF-MS.

| Rt<br>(min) | Detected<br>m/z | Assigned<br>ion    | Tentatively<br>identified compounds | Samples                 |
|-------------|-----------------|--------------------|-------------------------------------|-------------------------|
| 7.0         | 449.1093        | [M+H] <sup>+</sup> | Cyanidin 3-glucoside                | Brahmi essence, placebo |
| 7.1         | 595.1683        | [M] <sup>+</sup>   | Cyanidin 3-rutinoside               | Brahmi essence, placebo |
| 7.6         | 579.1693        | [M] <sup>+</sup>   | Pelargonidin3-O-rutinoside          | Brahmi essence, placebo |
| 9.7         | 611.1632        | [M+H] <sup>+</sup> | Rutin                               | Brahmi essence, placebo |
| 9.9         | 492.3182        | [M+H] <sup>+</sup> | Murusimic acid                      | Brahmi essence, placebo |
| 11.6        | 218.2126        | [M+H] <sup>+</sup> | iminodiethanol                      | Brahmi essence          |
| 15.6        | 951.4984        | [M+H] <sup>+</sup> | Bacoside A <sub>3</sub>             | Brahmi essence          |
| 16.1        | 951.4954        | [M+H] <sup>+</sup> | Bacopaside II                       | Brahmi essence          |
| 16.5        | 921.4855        | [M+H] <sup>+</sup> | Bacopaside X                        | Brahmi essence          |
| 16.6        | 921.4850        | [M+H] <sup>+</sup> | Bacopasaponin C                     | Brahmi essence          |
| 17.4        | 979.4601        | [M+H] <sup>+</sup> | Bacopaside I                        | Brahmi essence          |

**Table S2.** The percent change of response time for **memory speed** of participants from placebo run-in (2nd visit) to after 12-weeks (3rd visit) in treatment group and the placebo group.

| Group A  |                              | Group B  |                              |
|----------|------------------------------|----------|------------------------------|
| Subjects | % change of<br>response time | Subjects | % change of<br>response time |
| 1        | 6.37                         | 1        | 20.36                        |
| 2        | -24.87                       | 2        | -4.30                        |
| 3        | -31.91                       | 3        | 13.04                        |
| 4        | 8.19                         | 4        | -4.27                        |
| 5        | 1.36                         | 5        | -0.67                        |
| 6        | -2.71                        | 6        | -4.02                        |
| 7        | 0.02                         | 7        | -9.87                        |
| 8        | -3.92                        | 8        | -16.86                       |
| 9        | 4.27                         | 9        | 6.97                         |
| 10       | -19.82                       | 10       | 7.32                         |
| 11       | -22.22                       | 11       | 8.03                         |
| 12       | 4.24                         | 12       | -8.18                        |
| 13       | -4.32                        | 13       | 7.93                         |
| 14       | -4.71                        | 14       | 5.88                         |
| 15       | -30.72                       | 15       | -24.42                       |
| 16       | -3.31                        | 16       | -7.31                        |
| 17       | 5.61                         | 17       | -9.37                        |
| 18       | -24.28                       | 18       | -13.28                       |
| 19       | -23.76                       | 19       | -0.35                        |
| 20       | 0.50                         | 20       | -13.34                       |
| 21       | 0.25                         | 21       | 4.12                         |
|          |                              | 22       | 17.46                        |
|          |                              | 23       | -12.03                       |
|          |                              | 24       | -7.70                        |

**Table S3.** p-value of metabolic pathway from enrichment analysis by using Metaboanalyst (a) plasma, (b) Urine, (c) feces samples

| (a) | Metabolic pathway                                    | p value  |
|-----|------------------------------------------------------|----------|
|     | Aminoacyl-tRNA biosynthesis                          | 5.99E-05 |
|     | Phenylalanine, tyrosine, and tryptophan biosynthesis | 0.000538 |
|     | Valine, leucine, and isoleucine biosynthesis         | 0.00245  |
|     | Phenylalanine metabolism                             | 0.0039   |
|     | Valine, leucine, and isoleucine degradation          | 0.057    |
|     | Ubiquinone and other terpenoid-quinone biosynthesis  | 0.0855   |
|     | Pantothenate and CoA biosynthesis                    | 0.172    |
|     | Fatty acid degradation                               | 0.324    |
|     | Tryptophan metabolism                                | 0.337    |
|     | Tyrosine metabolism                                  | 0.344    |
| (b) | Metabolic pathway                                    | p value  |
|     | Phenylalanine, tyrosine, and tryptophan biosynthesis | 0.0131   |
|     | Phenylalanine metabolism                             | 0.0325   |
|     | Aminoacyl-tRNA biosynthesis                          | 0.148    |
| (c) | Metabolic pathway                                    | P value  |
|     | Aminoacyl-tRNA biosynthesis                          | 1.40E-08 |
|     | Phenylalanine, tyrosine, and tryptophan biosynthesis | 0.000339 |
|     | Valine, leucine, and isoleucine biosynthesis         | 0.00156  |
|     | Phenylalanine metabolism                             | 0.00248  |
|     | Valine, leucine, and isoleucine degradation          | 0.0376   |
|     | Ubiquinone and other terpenoid-quinone biosynthesis  | 0.0689   |
|     | Biotin metabolism                                    | 0.0763   |
|     | Lysine degradation                                   | 0.181    |
|     | Cysteine and methionine metabolism                   | 0.232    |
|     | Tryptophan metabolism                                | 0.28     |
|     | Tyrosine metabolism                                  | 0.286    |
|     | Fatty acid biosynthesis                              | 0.315    |
